# Supplementary material for: An Attempt to Appreciate Climate Change Impacts From a Rank-Size Rule Perspective
Source: Frontiers journal article supplement (doi:10.3389/fphy.2021.687900), 2022-02-21
Supplement: Data_Sheet_1.docx [file Data_Sheet_1.docx]

**SUPPLEMENTARY MATERIAL**

**TABLE S1.** Stations on the Northern Hemisphere [19, 27-29].

―――――――――――――――――――――――――――――――――――――――

**Ｎｏ．　　Ｓｔａｔｉｏｎ　　　　　　Lat.（˚　′）　　Lon.（˚　′）　Height（ｍ）**

―――――――――――――――――――――――――――――――――――――――

０１　Ｏｓｔｒｏｖ　Ｄｉｋｓｏｎ　　７３　３０　Ｎ　　８０　２４　Ｅ　　　４７

０２　Ｂａｒｒｏｗ　　　　　　　　　７１　１７　Ｎ　１５６　４７　Ｗ　　　１２

０３　Ｒｅｙｋｊａｖｉｋ　　　　　　６４　０８　Ｎ　　２１　５４　Ｗ　　　５４

０４　Ａｎｃｈｏｒａｇｅ　　　　　　６１　０９　Ｎ　１４９　５９　Ｗ　　　５２

０５　Ｈｅｌｓｉｎｋｉ　　　　　　　６０　１９　Ｎ　　２４　５８　Ｅ　　　５１

０６　Ｏｓｌｏ　　　　　　　　　　　６０　１２　Ｎ　　１１　０４　Ｅ　　２０２

０７　Ｓｔ．Ｐｅｔｅｒｓｂｕｒｇ　　５９　５８　Ｎ　　３０　１８　Ｅ　　　　６

０８　Ｓｔｏｃｋｈｏｌｍ　　　　　　５９　２１　Ｎ　　１７　５３　Ｅ　　　１５

０９　Ｍｏｓｋｖａ　　　　　　　　　５５　５０　Ｎ　　３７　３７　Ｅ　　１５６

１０　Ｋｏｅｂｅｎｈａｖｎ　　　　　５５　４１　Ｎ　　１２　３２　Ｅ　　　　７

１１　Ｏｍｓｋ　　　　　　　　　　　５５　０１　Ｎ　　７３　２３　Ｅ　　１２２

１２　Ｅｄｍｏｎｔｏｎ　　　　　　　５３　３４　Ｎ　１１３　３１　Ｗ　　６７１

１３　Ｄｕｂｌｉｎ　　　　　　　　　５３　２６　Ｎ　　０６　１５　Ｗ　　　６８

１４　Ｂｅｒｌｉｎ　　　　　　　　　５２　２８　Ｎ　　１３　２４　Ｅ　　　４８

１５　Ｉｒｋｕｔｓｋ　　　　　　　　５２　１６　Ｎ　１０４　１９　Ｅ　　４６９

１６　Ｗａｒｓｚａｗａ　　　　　　　５２　０９　Ｎ　　２０　５７　Ｅ　　１０６

１７　Ｄｅ　Ｂｉｌｔ　　　　　　　　５２　０５　Ｎ　　０５　１０　Ｅ　　　　１

１８　Ｌｏｎｄｏｎ　　　　　　　　　５１　２８　Ｎ　　００　２７　Ｗ　　　２４

１９　Ｋｉｅｖ　　　　　　　　　　　５０　２４　Ｎ　　３０　３４　Ｅ　　１６６

２０　Ｐｒａｈａ　　　　　　　　　　５０　０６　Ｎ　　１４　１５　Ｅ　　３８０

２１　Ｗｉｎｎｉｐｅｇ　　　　　　　４９　５５　Ｎ　　９７　１４　Ｗ　　２３８

２２　Ｌｕｘｅｍｂｏｕｒｇ　　　　　４９　３７　Ｎ　　０６　１３　Ｅ　　３７６

２３　Ｖａｎｃｏｕｖｅｒ　　　　　　４９　１１　Ｎ　１２３　１０　Ｗ　　　　４

２４　Ｍｕｅｎｃｈｅｎ　　　　　　　４８　２１　Ｎ　　１１　４８　Ｅ　　４４３

２５　Ｗｉｅｎ　　　　　　　　　　　４８　１４　Ｎ　　１６　２１　Ｗ　　１９８

２６　Ｂｕｄａｐｅｓｔ　　　　　　　４７　２６　Ｎ　　１９　１１　Ｅ　　１３８

２７　Ｚｕｅｒｉｃｈ　　　　　　　　４７　２２　Ｎ　　０８　３３　Ｅ　　５５５

２８　Ｌｙｏｎ　　　　　　　　　　　４５　４３　Ｎ　　０４　５６　Ｅ　　１９７

２９　Ｍｏｎｔｒｅａｌ　　　　　　　４５　２８　Ｎ　　７３　４５　Ｗ　　　３５

３０　Ｂｅｏｇｒａｄ　　　　　　　　４４　４８　Ｎ　　２０　２８　Ｅ　　１３２

３１　Ｂｕｃｕｒｅｓｔｉ　　　　　　４４　３０　Ｎ　　２６　０４　Ｅ　　　９０

３２　Ｃｈａｎｇ－ｃｈｕｎ　　　　　４３　５４　Ｎ　１２５　１３　Ｅ　　２３８

３３　Ｕｒｕｍｃｈｉ　　　　　　　　４３　４７　Ｎ　　８７　３９　Ｅ　　９３６

３４　Ｖｌａｄｉｖｏｓｔｏｋ　　　　４３　０７　Ｎ　１３１　５６　Ｅ　　１８３

３５　Ｓａｐｐｏｒｏ　　　　　　　　４３　０４　Ｎ　１４１　２０　Ｅ　　　１７

３６　Ｓｏｆｉａ　　　　　　　　　　４２　３９　Ｎ　　２３　２３　Ｅ　　５９５

３７　Ｂｏｓｔｏｎ　　　　　　　　　４２　２２　Ｎ　　７１　０２　Ｗ　　　　６

３８　Ｃｈｉｃａｇｏ　　　　　　　　４１　５９　Ｎ　　８７　５４　Ｗ　　２０３

３９　Ｓｈｅｎｙａｎｇ　　　　　　　４１　４４　Ｎ　１２３　３１　Ｅ　　　４９

４０　Ｔａｓｈｋｅｎｔ　　　　　　　４１　２０　Ｎ　　６９　１８　Ｅ　　４８８

４１　Ｂａｒｃｅｌｏｎａ　　　　　　４１　１７　Ｎ　　０２　０４　Ｅ　　　　４

４２　Ｉｓｔａｎｂｕｌ　　　　　　　４０　５４　Ｎ　　２９　０９　Ｅ　　　１８

４３　Ｎｅｗ　Ｙｏｒｋ　　　　　　　４０　４６　Ｎ　　７３　５４　Ｗ　　　　７

４４　Ｍａｄｒｉｄ　　　　　　　　　４０　２４　Ｎ　　０３　４０　Ｗ　　６６７

４５　Ａｎｋａｒａ　　　　　　　　　３９　５７　Ｎ　　３２　５３　Ｅ　　８９１

４６　Ｄｅｎｖｅｒ　　　　　　　　　３９　４６　Ｎ　１０４　５２　Ｗ　１６１１

４７　Ｋａｓｈｇａｒ　　　　　　　　３９　２８　Ｎ　　７５　５９　Ｅ　１２９１

４８　Ｄａｌｉａｎ　　　　　　　　　３８　５４　Ｎ　１２１　３８　Ｅ　　　９７

４９　Ｗａｓｈｉｎｇｔｏｎ　　　　　３８　５１　Ｎ　　７７　０２　Ｗ　　　　５

５０　Ｌｉｓｂｏａ　　　　　　　　　３８　４３　Ｎ　　０９　０９　Ｗ　　　７７

５１　Ａｓｈｇａｂａｔ　　　　　　　３７　５５　Ｎ　　５８　０８　Ｅ　　３１２

５２　Ａｔｈｉｎａｉ　　　　　　　　３７　４４　Ｎ　　２３　４４　Ｅ　　　２８

５３　Ｓａｎ　Ｆｒａｎｃｉｓｃｏ　　３７　３７　Ｎ　１２２　２３　Ｗ　　　　６

５４　Ｔｕｎｉｓ　　　　　　　　　　３６　５０　Ｎ　　１０　１４　Ｅ　　　　４

５５　Ｄａｒ－Ｅｌ－Ｂｅｉｄａ　　　３６　４１　Ｎ　　０３　１３　Ｅ　　　２５

５６　Ｇｉｂｒａｌｔａｒ　　　　　　３６　０９　Ｎ　　０５　２０　Ｗ　　　　５

５７　Ｌａｓ　Ｖｅｇａｓ　　　　　　３６　０５　Ｎ　１１５　１０　Ｗ　　６６２

５８　Ｔｅｈｒａｎ　　　　　　　　　３５　４１　Ｎ　　５１　１９　Ｅ　１２０４

５９　Ｔｏｋｙｏ　　　　　　　　　　３５　４１　Ｎ　１３９　４６　Ｅ　　　　６

６０　Ｏｓａｋａ　　　　　　　　　　３４　４１　Ｎ　１３５　３１　Ｅ　　　２３

６１　Ｐｅｓｈａｗａｒ　　　　　　　３４　０１　Ｎ　　７１　３５　Ｅ　　３５９

６２　Ａｔｌａｎｔａ　　　　　　　　３３　３９　Ｎ　　８４　２５　Ｗ　　３１２

６３　Ｆｕｋｕｏｋａ　　　　　　　　３３　３５　Ｎ　１３０　２３　Ｅ　　　　３

６４　Ｄａｍａｓｃｕｓ　　　　　　　３３　２５　Ｎ　　３６　３１　Ｅ　　６０８

６５　Ａｍｍａｎ　　　　　　　　　　３１　５９　Ｎ　　３５　５９　Ｅ　　７７８

６６　Ｓｈａｎｇｈａｉ　　　　　　　３１　２５　Ｎ　１２１　２７　Ｅ　　　　９

６７　Ｗｕｈａｎ　　　　　　　　　　３０　３６　Ｎ　１１４　０３　Ｅ　　　２４

６８　Ｃａｉｒｏ　　　　　　　　　　３０　０６　Ｎ　　３１　２４　Ｅ　　１１６

６９　Ｎｅｗ　Ｏｒｌｅａｎｓ　　　　２９　５９　Ｎ　　９０　１５　Ｗ　　　　１

７０　Ｌｈａｓａ　　　　　　　　　　２９　４０　Ｎ　　９１　０８　Ｅ　３６５０

７１　Ｎｅｗ　Ｄｅｌｈｉ　　　　　　２８　３５　Ｎ　　７７　１２　Ｅ　　２１１

７２　Ｎａｚｅ　　　　　　　　　　　２８　２３　Ｎ　１２９　３０　Ｅ　　　　３

７３　Ｍｉａｍｉ　　　　　　　　　　２５　４５　Ｎ　　８０　２３　Ｗ　　　　４

７４　Ｔａｉｐｅｉ　　　　　　　　　２５　０２　Ｎ　１２１　３１　Ｅ　　　　９

７５　Ｋｕｎｍｉｎｇ　　　　　　　　２５　０１　Ｎ　１０２　４１　Ｅ　１８９２

７６　Ｋａｒａｃｈｉ　　　　　　　　２４　５４　Ｎ　　６７　０８　Ｅ　　　２１

７７　Ｒｉｙａｄｈ　　　　　　　　　２４　４２　Ｎ　　４６　４４　Ｅ　　６３５

７８　Ａｓｓｗａｎ　　　　　　　　　２３　５７　Ｎ　　３２　４９　Ｅ　　２０１

７９　Ｋｏｌｋａｔａ　　　　　　　　２２　３２　Ｎ　　８８　２０　Ｅ　　　　６

８０　Ｈｏｎｇ　Ｋｏｎｇ　　　　　　２２　１８　Ｎ　１１４　１０　Ｅ　　　３１

８１　Ｈｏｎｏｌｕｌｕ　　　　　　　２１　２１　Ｎ　１５７　５６　Ｗ　　　　２

８２　Ｂｏｍｂａｙ　　　　　　　　　１８　５４　Ｎ　　７２　４９　Ｅ　　　　９

８３　Ｋｉｎｇｓｔｏｎ　　　　　　　１７　５６　Ｎ　　７６　４７　Ｗ　　　　３

８４　Ｙａｎｇｏｎ　　　　　　　　　１６　４６　Ｎ　　９６　１０　Ｅ　　　１４

８５　Ｋｈａｒｔｏｕｍ　　　　　　　１５　３６　Ｎ　　３２　３３　Ｅ　　３８２

８６　Ｄａｋａｒ　　　　　　　　　　１４　４３　Ｎ　　１７　３０　Ｗ　　　２４

８７　Ｂａｎｇｋｏｋ　　　　　　　　１３　４３　Ｎ　１００　３３　Ｅ　　　　３

８８　Ｎｉａｍｅｙ　　　　　　　　　１３　２９　Ｎ　　０２　１０　Ｅ　　２２３

８９　Ｇｕａｍ　　　　　　　　　　　１３　２８　Ｎ　１４４　４７　Ｅ　　　７５

９０　Ｂａｍａｋｏ　　　　　　　　　１２　３２　Ｎ　　０７　５７　Ｗ　　３８０

９１　Ｎｄｊａｍｅｎａ　　　　　　　１２　０８　Ｎ　　１５　０２　Ｅ　　２９５

９２　Ｄｊｉｂｏｕｔｉ　　　　　　　１１　３３　Ｎ　　４３　０９　Ｅ　　　１３

９３　Ａｄｄｉｓ　Ａｂａｂａ　　　　０９　０２　Ｎ　　３８　４５　Ｅ　２３５４

９４　Ｃｏｌｏｍｂｏ　　　　　　　　０６　５４　Ｎ　　７９　５２　Ｅ　　　　７

９５　Ｂｏｇｏｔａ　　　　　　　　　０４　４２　Ｎ　　７４　０９　Ｗ　２５４７

９６　Ｋｕａｌａ　Ｌｕｍｐｕｒ　　　０３　０７　Ｎ　１０１　３３　Ｅ　　　２７

９７　Ｓｉｎｇａｐｏｒｅ　　　　　　０１　２２　Ｎ　１０３　５９　Ｅ　　　　５

――――――――――――――――――――――――――――――――――――――――

**TABLE S2.** Stations on the Southern Hemisphere [19, 27-29].

――――――――――――――――――――――――――――――――――――――――

**Ｎｏ．　　Ｓｔａｔｉｏｎ　　　　　　Lat.（˚　′）　　Lon.（˚　′）　Height（ｍ）**

―――――――――――――――――――――――――――――――――――――――

０１　Ｕｓｈｕａｉａ　　　　　　　　５４　４８　Ｓ　　６８　１９　Ｗ　　　２８

０２　Ｃｈｒｉｓｔｃｈｕｒｃｈ　　　４３　２９　Ｓ　１７２　３３　Ｅ　　　３８

０３　Ｍｅｌｂｏｕｒｎｅ　　　　　　３７　３９　Ｓ　１４４　４９　Ｅ　　１３２

０４　Ａｕｃｋｌａｎｄ　　　　　　　３７　０１　Ｓ　１７４　４８　Ｅ　　　　７

０５　Ｃａｎｂｅｒｒａ　　　　　　　３５　１８　Ｓ　１４９　１２　Ｅ　　５７５

０６　Ｂｕｅｎｏｓ　Ａｉｒｅｓ　　　３４　３５　Ｓ　　５８　２９　Ｗ　　　２５

０７　Ｃａｐｅ　Ｔｏｗｎ　　　　　　３３　５８　Ｓ　　１８　３６　Ｅ　　　４６

０８　Ｓｙｄｎｅｙ　　　　　　　　　３３　５６　Ｓ　１５１　１０　Ｅ　　　　６

０９　Ｐｅｒｔｈ　　　　　　　　　　３１　５５　Ｓ　１１５　５８　Ｅ　　　２０

１０　Ｍａｐｕｔｏ　　　　　　　　　２５　５５　Ｓ　　３２　３４　Ｅ　　　３９

１１　Ｐｒｅｔｏｒｉａ　　　　　　　２５　４４　Ｓ　　２８　１１　Ｅ　１３０８

１２　Ｒｉｏ　Ｄｅ　Ｊａｎｅｉｒｏ　２２　５５　Ｓ　　４３　１０　Ｗ　　　　５

１３　Ｌａ　Ｐａｚ　　　　　　　　　１６　３１　Ｓ　　６８　１１　Ｗ　４０５８

１４　Ｓａｌｖａｄｏｒ　　　　　　　１３　０１　Ｓ　　３８　３１　Ｗ　　　５２

１５　Ｌｉｍａ　　　　　　　　　　　１２　０１　Ｓ　　７７　０７　Ｗ　　　１２

１６　Ｈｏｎｉａｒａ　　　　　　　　０９　２５　Ｓ　１６０　０３　Ｅ　　　　８

１７　Ｄａｒ　Ｅｓ　Ｓａｌａａｍ　　０６　５２　Ｓ　　３９　１２　Ｅ　　　５５

１８　Ｍａｎａｕｓ　　　　　　　　　０３　０８　Ｓ　　６０　０１　Ｗ　　　７２

１９　Ｎａｉｒｏｂｉ　　　　　　　　０１　１９　Ｓ　　３６　５４　Ｅ　１６２４

―――――――――――――――――――――――――――――――――――――――

**TABLE S3.** Observational stations in Japan [19, 27-29].

――――――――――――――――――――――――――――――――――――――――

**Ｎｏ．　　Ｓｔａｔｉｏｎ　　　　　Lat.（˚　′）　　　Lon.（˚　′）　Height（ｍ）**

――――――――――――――――――――――――――――――――――――――――

０１　Ｗａｋｋａｎａｉ　　　　　４５　２５　Ｎ　　　１４１　４１　Ｅ　　　　３

０２　Ａｂａｓｈｉｒｉ　　　　　４４　０１　Ｎ　　　１４４　１７　Ｅ　　　３８

０３　Ａｓａｈｉｋａｗａ　　　　４３　４６　Ｎ　　　１４２　２２　Ｅ　　１２０

０４　Ｎｅｍｕｒｏ　　　　　　　４３　２０　Ｎ　　　１４５　３５　Ｅ　　　２５

０５　Ｓａｐｐｏｒｏ　　　　　　４３　０４　Ｎ　　　１４１　２０　Ｅ　　　１７

０６　Ｋｕｓｈｉｒｏ　　　　　　４２　５９　Ｎ　　　１４４　２３　Ｅ　　　　５

０７　Ｏｂｉｈｉｒｏ　　　　　　４２　５５　Ｎ　　　１４３　１３　Ｅ　　　３８

０８　Ｓｕｔｔｓｕ　　　　　　　４２　４８　Ｎ　　　１４０　１３　Ｅ　　　３３

０９　Ｕｒａｋａｗａ　　　　　　４２　１０　Ｎ　　　１４２　４７　Ｅ　　　３７

１０　Ｈａｋｏｄａｔｅ　　　　　４１　４９　Ｎ　　　１４０　４５　Ｅ　　　３５

１１　Ａｏｍｏｒｉ　　　　　　　４０　４９　Ｎ　　　１４０　４６　Ｅ　　　　３

１２　Ａｋｉｔａ　　　　　　　　３９　４３　Ｎ　　　１４０　０６　Ｅ　　　　６

１３　Ｍｏｒｉｏｋａ　　　　　　３９　４２　Ｎ　　　１４１　１０　Ｅ　　１５５

１４　Ｍｉｙａｋｏ　　　　　　　３９　３９　Ｎ　　　１４１　５８　Ｅ　　　４３

１５　Ｓａｋａｔａ　　　　　　　３８　５５　Ｎ　　　１３９　５１　Ｅ　　　　３

１６　Ｓｅｎｄａｉ　　　　　　　３８　１６　Ｎ　　　１４０　５４　Ｅ　　　３９

１７　Ｙａｍａｇａｔａ　　　　　３８　１５　Ｎ　　　１４０　２１　Ｅ　　１５３

１８　Ａｉｋａｗａ　　　　　　　３８　０２　Ｎ　　　１３８　１４　Ｅ　　　　６

１９　Ｎｉｇａｔａ　　　　　　　３７　５４　Ｎ　　　１３９　０１　Ｅ　　　　４

２０　Ｆｕｋｕｓｈｉｍａ　　　　３７　４６　Ｎ　　　１４０　２８　Ｅ　　　６７

２１　Ｗａｊｉｍａ　　　　　　　３７　２３　Ｎ　　　１３６　５４　Ｅ　　　　５

２２　Ｔａｋａｄａ　　　　　　　３７　０６　Ｎ　　　１３８　１５　Ｅ　　　１３

２３　Ｏｎａｈａｍａ　　　　　　３６　５７　Ｎ　　　１４０　５４　Ｅ　　　　３

２４　Ｔｏｙａｍａ　　　　　　　３６　４３　Ｎ　　　１３７　１２　Ｅ　　　　９

２５　Ｎａｇａｎｏ　　　　　　　３６　４０　Ｎ　　　１３８　１２　Ｅ　　４１８

２６　Ｋａｎａｚａｗａ　　　　　３６　３５　Ｎ　　　１３６　３８　Ｅ　　　　６

２７　Ｕｔｓｕｍｏｍｉｙａ　　　３６　３３　Ｎ　　　１３９　５２　Ｅ　　１１９

２８　Ｍａｅｂａｓｈｉ　　　　　３６　２４　Ｎ　　　１３９　２３　Ｅ　　１１２

２９　Ｍｉｔｏ　　　　　　　　　３６　２３　Ｎ　　　１４０　２８　Ｅ　　　２９

３０　Ｋａｒｕｉｚａｗａ　　　　３６　２１　Ｎ　　　１３８　３３　Ｅ　　９９９

３１　Ｍａｔｓｕｍｏｔｏ　　　　３６　１５　Ｎ　　　１３７　５８　Ｅ　　６１０

３２　Ｓａｉｇｏ　　　　　　　　３６　１２　Ｎ　　　１３３　２０　Ｅ　　　２７

３３　Ｋｕｍａｇａｙａ　　　　　３６　０９　Ｎ　　　１３９　２３　Ｅ　　　３０

３４　Ｔａｋａｙａｍａ　　　　　３６　０９　Ｎ　　　１３７　１５　Ｅ　　５６０

３５　Ｆｕｋｕｉ　　　　　　　　３６　０３　Ｎ　　　１３６　１３　Ｅ　　　　９

３６　Ｃｈｏｓｈｉ　　　　　　　３５　４４　Ｎ　　　１４０　５１　Ｅ　　　２０

３７　Ｔｏｋｙｏ　　　　　　　　３５　４１　Ｎ　　　１３９　４６　Ｅ　　　　６

３８　Ｋｏｆｕ　　　　　　　　　３５　４０　Ｎ　　　１３８　３３　Ｅ　　２７３

３９　Ｔｓｕｒｕｇａ　　　　　　３５　３９　Ｎ　　　１３６　０４　Ｅ　　　　２

４０　Ｉｄａ　　　　　　　　　　３５　３１　Ｎ　　　１３７　４９　Ｅ　　５１６

４１　Ｔｏｔｔｏｒｉ　　　　　　３５　２９　Ｎ　　　１３４　１４　Ｅ　　　　７

４２　Ｙｏｋｏｈａｍａ　　　　　３５　２６　Ｎ　　　１３９　３９　Ｅ　　　３９

４３　Ｇｉｆｕ　　　　　　　　　３５　２４　Ｎ　　　１３６　４６　Ｅ　　　１３

４４　Ｈｉｋｏｎｅ　　　　　　　３５　１７　Ｎ　　　１３６　１５　Ｅ　　　８７

４５　Ｎａｇｏｙａ　　　　　　　３５　１０　Ｎ　　　１３６　５８　Ｅ　　　５１

４６　Ｋｙｏｔｏ　　　　　　　　３５　０１　Ｎ　　　１３５　４４　Ｅ　　　４１

４７　Ｓｈｉｚｕｏｋａ　　　　　３４　５９　Ｎ　　　１３８　２４　Ｅ　　　１４

４８　Ｈａｍａｄａ　　　　　　　３４　５４　Ｎ　　　１３２　０４　Ｅ　　　１９

４９　Ｏｓｈｉｍａ　　　　　　　３４　４５　Ｎ　　　１３９　２２　Ｅ　　　７４

５０　Ｈａｍａｍａｔｓｕ　　　　３４　４５　Ｎ　　　１３７　４３　Ｅ　　　４６

５１　Ｔｓｕ　　　　　　　　　　３４　４４　Ｎ　　　１３６　３１　Ｅ　　　　３

５２　Ｋｏｂｅ　　　　　　　　　３４　４２　Ｎ　　　１３５　１３　Ｅ　　　　５

５３　Ｏｓａｋａ　　　　　　　　３４　４１　Ｎ　　　１３５　３１　Ｅ　　　２３

５４　Ｏｋａｙａｍａ　　　　　　３４　４０　Ｎ　　　１３３　５５　Ｅ　　　　３

５５　Ｈｉｒｏｓｈｉｍａ　　　　３４　２４　Ｎ　　　１３２　２８　Ｅ　　　　４

５６　Ｔａｋａｍａｔｓｕ　　　　３４　１９　Ｎ　　　１３４　０３　Ｅ　　　　９

５７　Ｗａｋａｙａｍａ　　　　　３４　１４　Ｎ　　　１３５　１０　Ｅ　　　１４

５８　Ｉｚｕｈａｒａ　　　　　　３４　１２　Ｎ　　　１２９　１８　Ｅ　　　　４

５９　Ｏｗａｓｅ　　　　　　　　３４　０４　Ｎ　　　１３６　１２　Ｅ　　　１５

６０　Ｔｏｋｕｓｈｉｍａ　　　　３４　０４　Ｎ　　　１３４　３４　Ｅ　　　　２

６１　Ｓｈｉｍｏｎｏｓｅｋｉ　　３３　５７　Ｎ　　　１３０　５６　Ｅ　　　　３

６２　Ｍａｔｓｕｙａｍａ　　　　３３　５１　Ｎ　　　１３２　４７　Ｅ　　　３２

６３　Ｆｕｋｕｏｋａ　　　　　　３３　３５　Ｎ　　　１３０　２３　Ｅ　　　　３

６４　Ｋｏｃｈｉ　　　　　　　　３３　３４　Ｎ　　　１３３　３３　Ｅ　　　　１

６５　Ｕｓｈｉｏｍｉｓａｋｉ　　３３　２７　Ｎ　　　１３５　４５　Ｅ　　　６８

６６　Ｓａｇａ　　　　　　　　　３３　１６　Ｎ　　　１３０　１８　Ｅ　　　　６

６７　Ｍｕｒｏｔｏｍｉｓａｋｉ　３３　１５　Ｎ　　　１３４　１１　Ｅ　　１８５

６８　Ｏｉｔａ　　　　　　　　　３３　１４　Ｎ　　　１３１　３７　Ｅ　　　　５

６９　Ｈａｃｈｉｊｏｊｉｍａ　　３３　０７　Ｎ　　　１３９　４７　Ｅ　　１５１

７０　Ｋｕｍａｍｏｔｏ　　　　　３２　４９　Ｎ　　　１３０　４２　Ｅ　　　３８

７１　Ｎａｇａｓａｋｉ　　　　　３２　４４　Ｎ　　　１２９　５２　Ｅ　　　２７

７２　Ｓｈｉｍｉｚｕ　　　　　　３２　４３　Ｎ　　　１３３　０１　Ｅ　　　３１

７３　Ｍｉｙａｚａｋｉ　　　　　３１　５６　Ｎ　　　１３１　２５　Ｅ　　　　９

７４　Ｋａｇｏｓｈｉｍａ　　　　３１　３３　Ｎ　　　１３０　３３　Ｅ　　　　４

７５　Ｎａｚｅ　　　　　　　　　２８　２３　Ｎ　　　１２９　３０　Ｅ　　　　３

――――――――――――――――――――――――――――――――――――――――
